# Supplementary material for: A rapid, facile, and economical method for the isolation of ribosomes and translational machinery for structural and functional studies
Source: PubMed Central journal article supplement — bioRxiv. 2024 Oct 22:2024.10.21.619433. Preprint. [Version 1] doi: 10.1101/2024.10.21.619433 (PMC11526893; doi:10.1101/2024.10.21.619433), 2024-10-22
Supplement: media-1.pdf [file media-1.pdf]

# Supplementary Figure 1

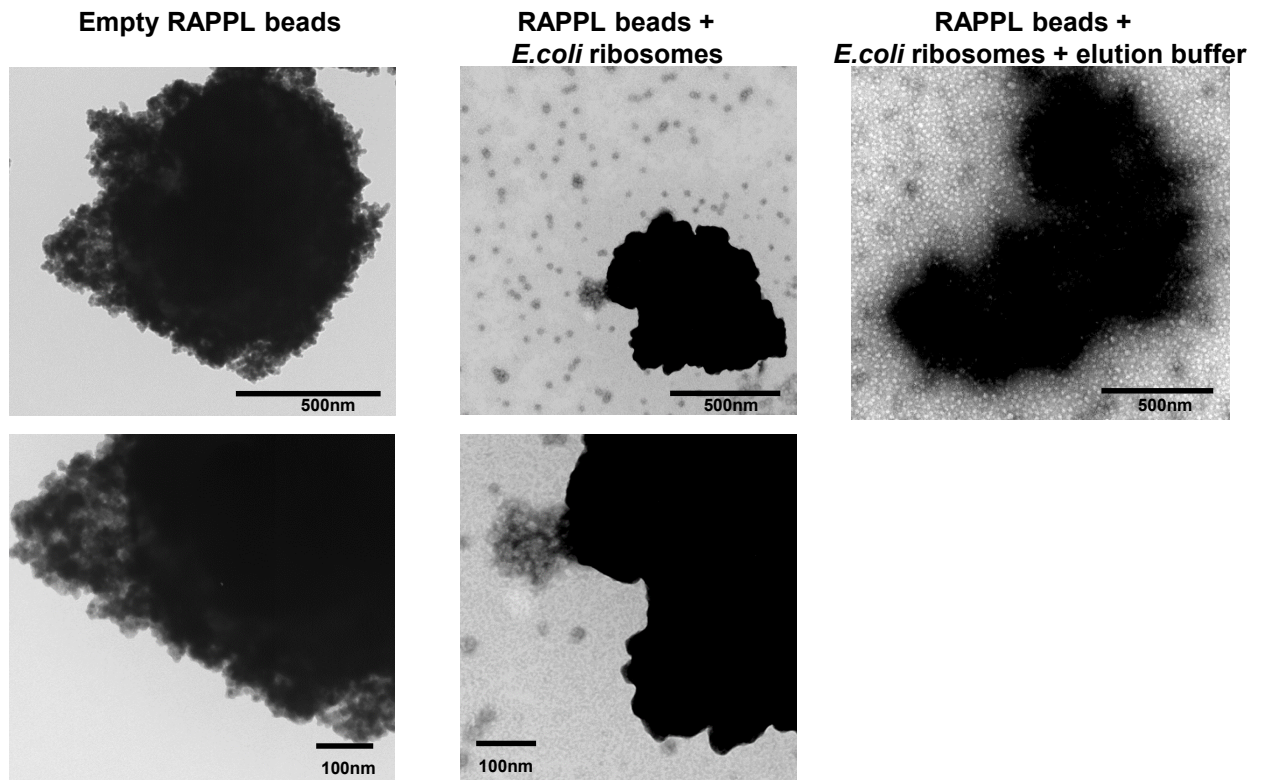

**Supplementary Figure 1. Binding of *E.coli* ribosomes (NEB PURExpress® *in vitro* kit) to poly-L-lysine beads (Puramag™, MCLAB).** Poly-L-lysine magnetic beads were incubated with wash buffer only or with *E. coli* ribosomes in absence or presence of elution buffer.

## Supplementary Figure 2

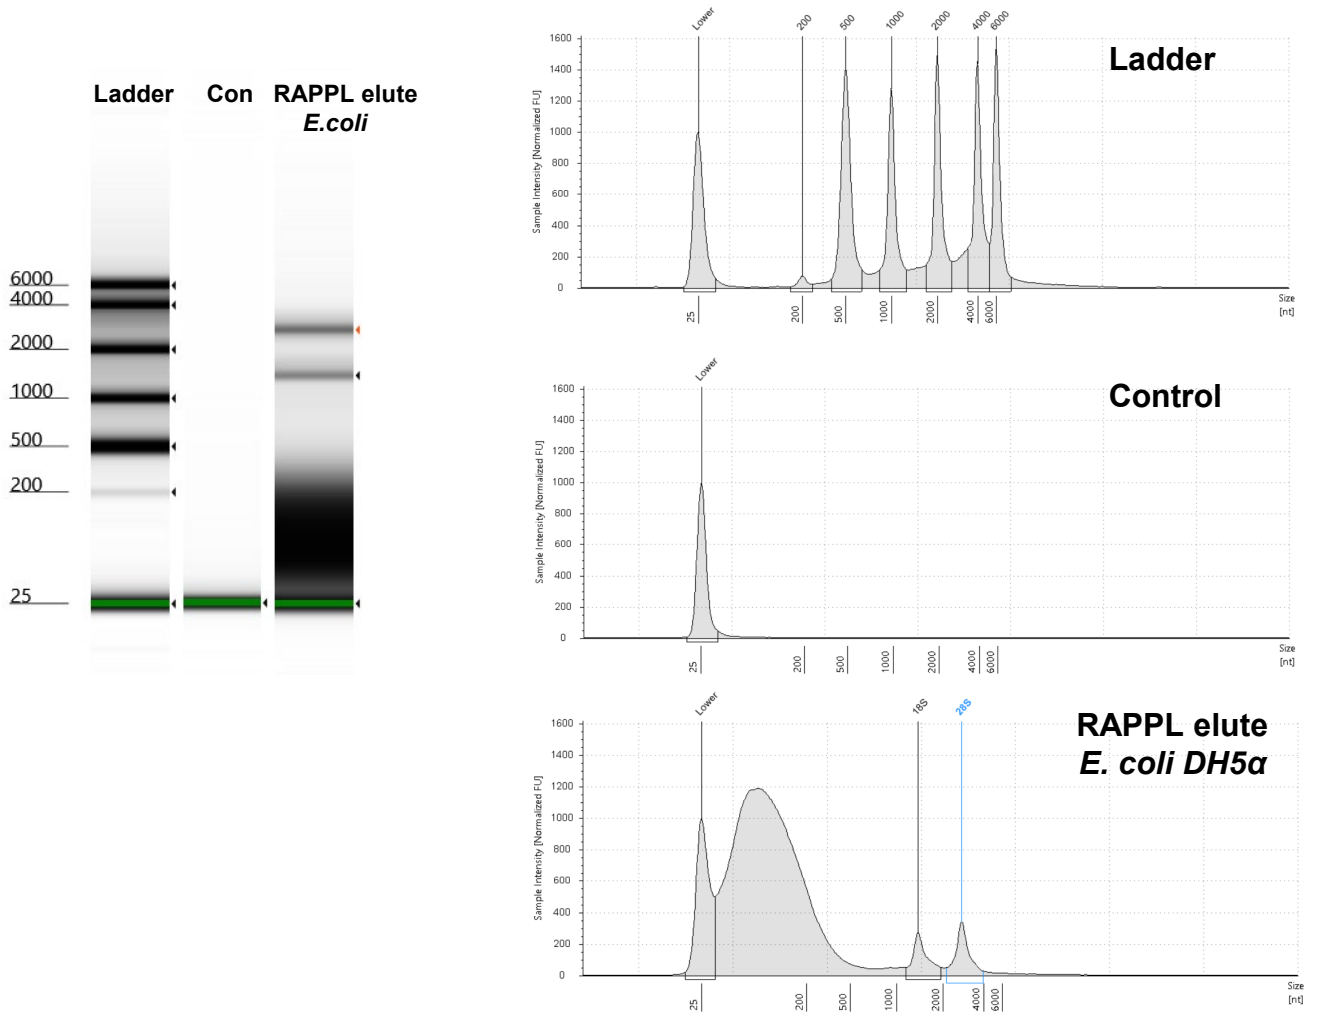

**Supplementary Figure 2. Bioanalyzer analysis of RNA species associated with RAPPL purification from *E. coli* DH5 $\alpha$  cells.** Image of the ladder, control (elution buffer) and diluted RAPPL elution from *E. coli* lysate purification. Electropherogram indicating ribosomal subunits as well as smaller and partially degraded RNA species.

# Supplementary Figure 3

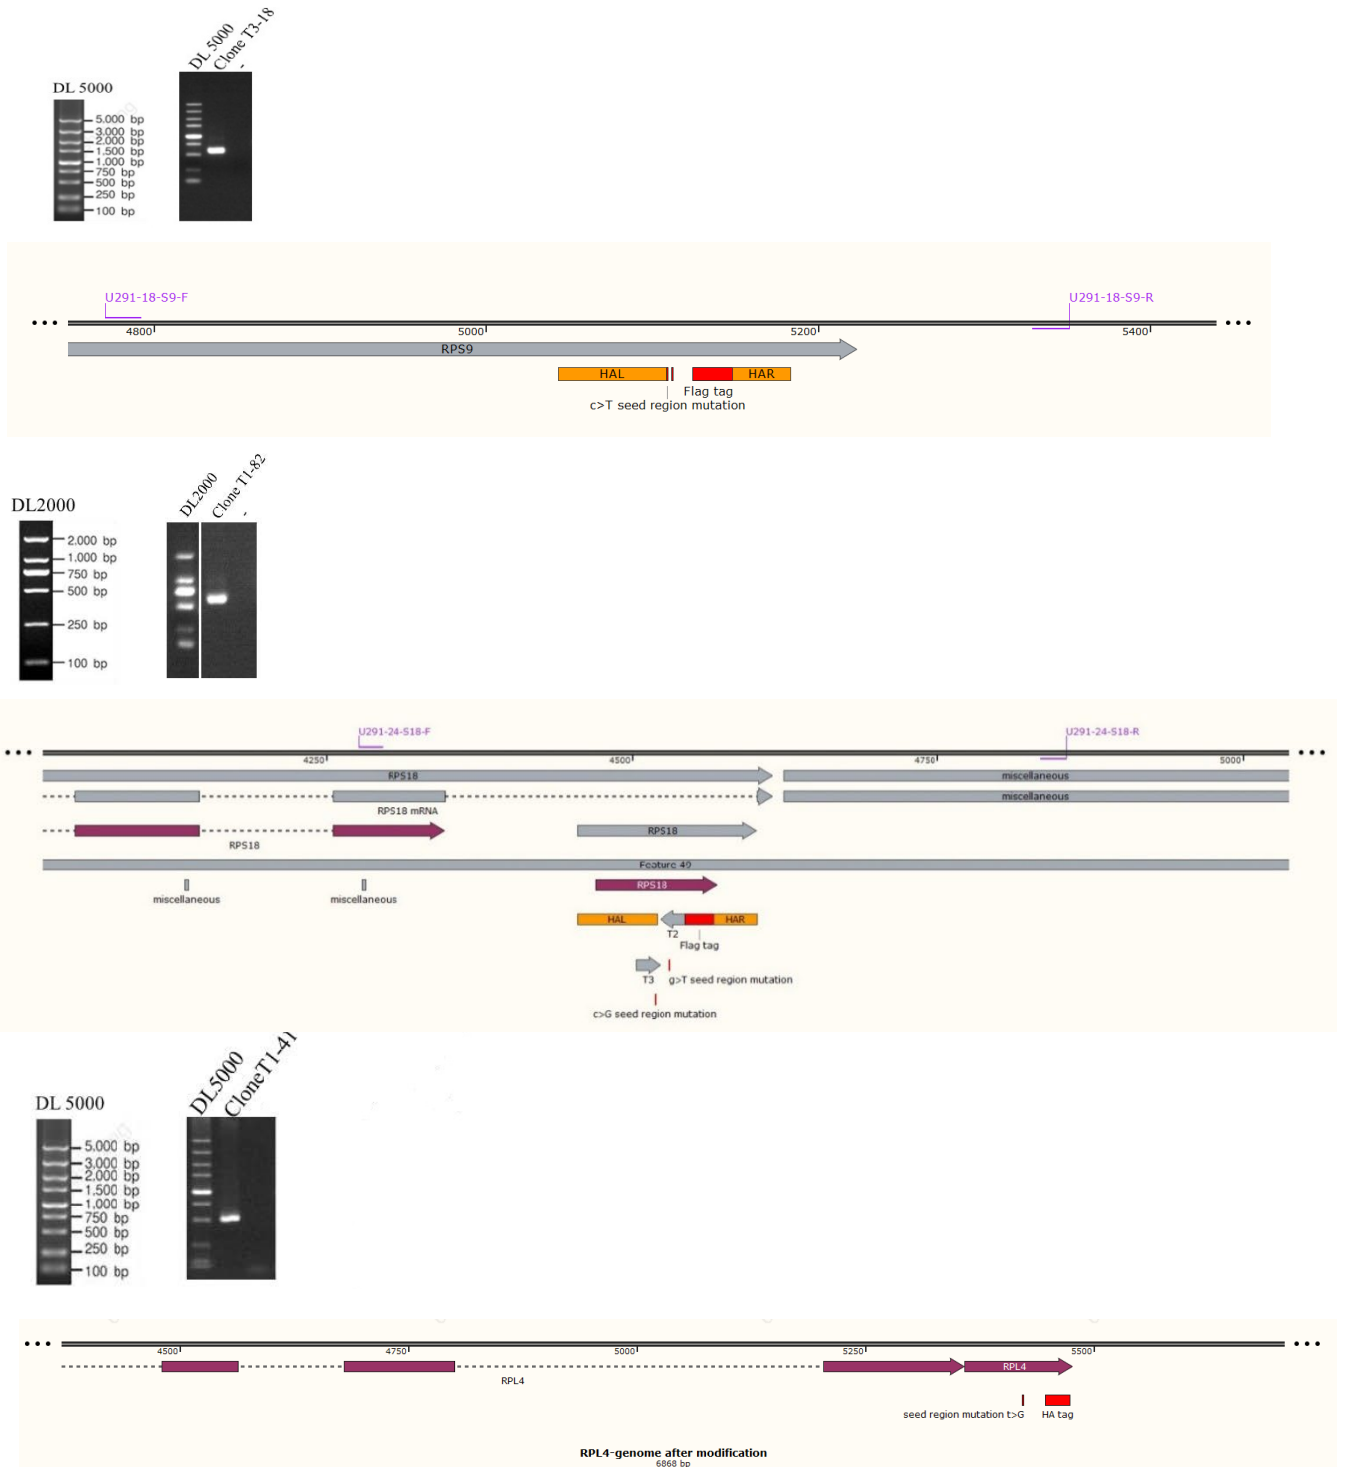

**Supplementary Figure 2. CRISPR/Cas9 engineered Hek293 cell lines.** Images of the DNA isolated from engineered uS4, uS13 and uL4 as well as map of primers for modified single clone validation are indicated. Targeted insertion of Flag- and HA-tags in ribosomal proteins is indicated in maps as well. Cell lines and images were generated by Genscript.

## Supplementary Figure 4

A.

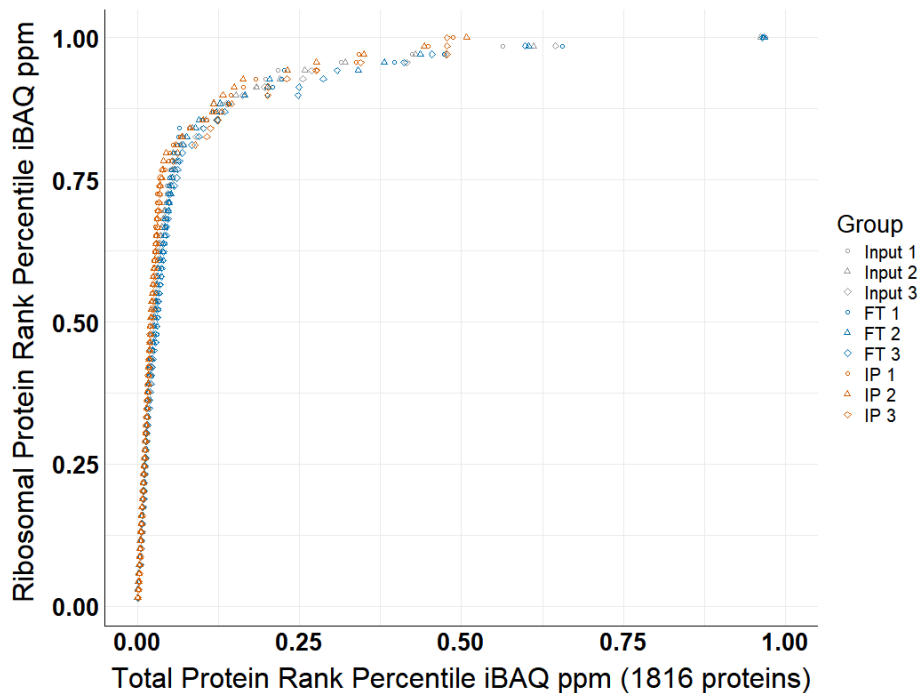

B.

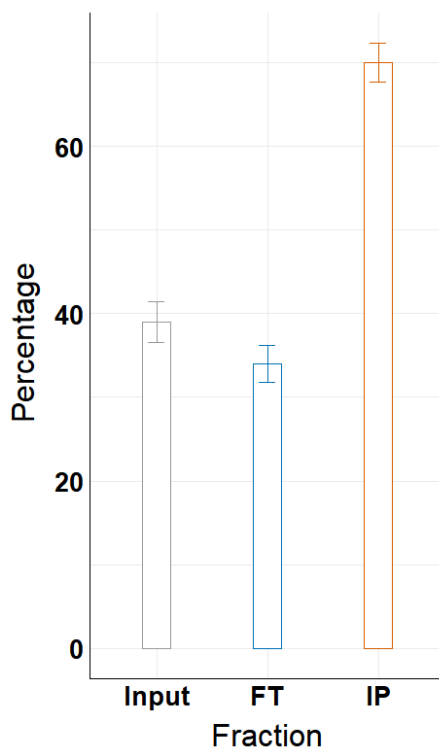

**Supplementary Figure 4. Mass spectrometry analysis of *E. coli* RAPPL purifications.** **a**, Plot of the of each ribosomal protein's rank percentile in relation to total protein rank percentile for each replicate of input, flow-through (FT), and bead-bound (IP) fractions. **b**, Graph representing percentage of ribosomal proteins in total protein associated with input, flow-through (FT), and bead-bound (IP) fractions. Error bars represent standard deviation of triplicate averages.

## Supplementary Figure 5

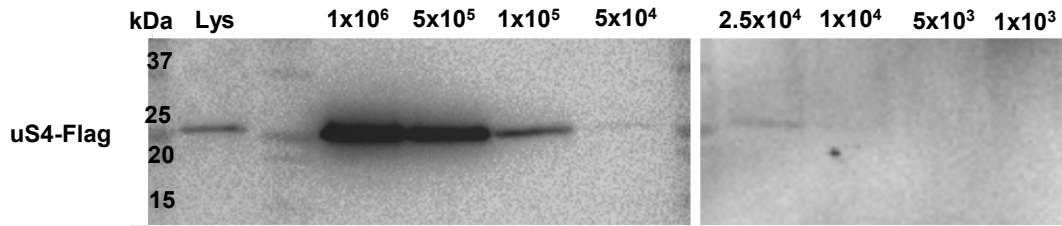

**Supplementary Figure 5. RAPPL can purify ribosomes from limited HEK-293 cell sample.** Western blot analysis using  $\alpha$ Flag antibody on RAPPL eluates of HEK-293 cells in which uS4 was Flag-tagged by CRISPR/Cas9 whereby the starting cells were diluted to  $1 \times 10^6$ ,  $5 \times 10^5$ ,  $1 \times 10^5$ ,  $2.5 \times 10^4$ ,  $1 \times 10^4$ ,  $5 \times 10^4$  and  $1 \times 10^3$  cells prior to lysis. Molecular weight markers indicate size of tagged uS4 protein.

## Supplementary Figure 6

**a**

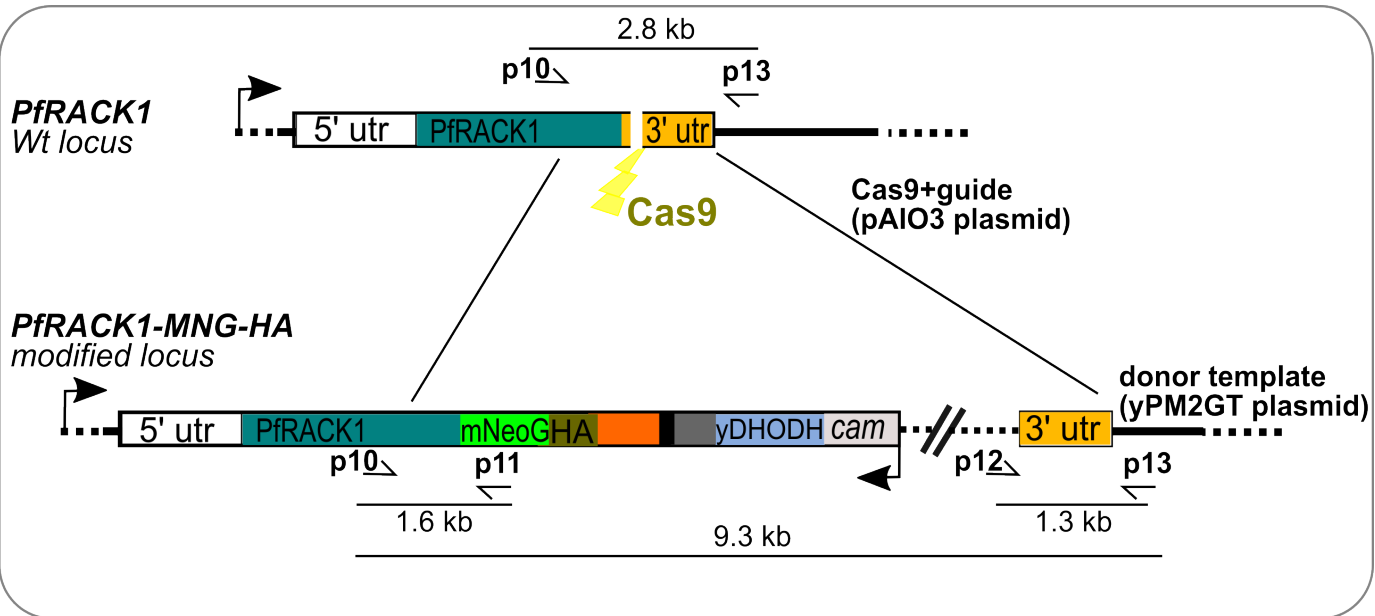

**b**

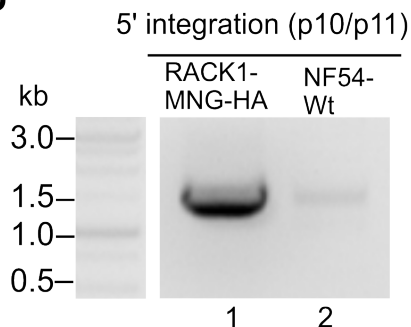

**c**

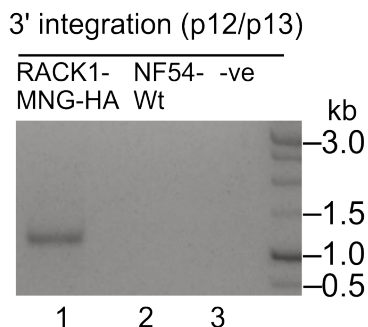

**d**

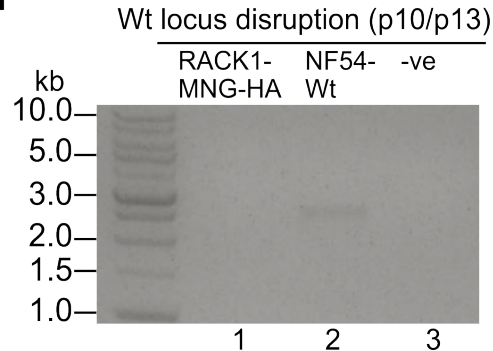

**Supplementary Figure 6:** Endogenous C-terminal tagging of *Plasmodium* PfRACK1 with mNeonGreen-3xHA tag. **(a)** Schematic of CRISPR/Cas9 strategy used to edit *PfRACK1* locus. **(b-d)** Agarose gels showing PCR products from genomic DNA of the cell line with the modified locus, demonstrating PCR amplicons across the 5' **(b)** and 3' **(c)** integration junction as well as the absence of the original locus **(d)**. Primers used are as indicated in **(a)** and are listed in material section. MNG: mNeonGreen; HA: hemagglutinin epitope tag; utr: untranslated region; yDHODH: yeast dihydroorotate dehydrogenase selectable marker; cam: calmodulin promoter; NF54-Wt: wild type parental line; -ve: no template negative control.

## Supplementary Figure 7

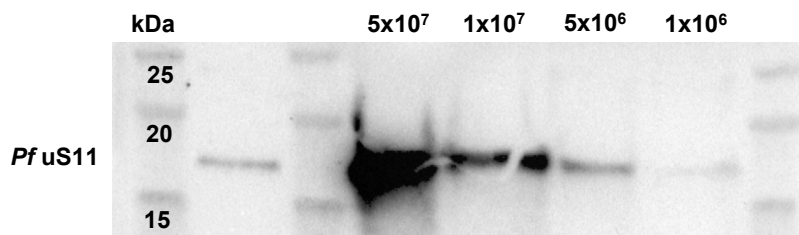

**Supplementary Figure 7. RAPPL can purify ribosomes from limited *P. falciparum*.** Western blot analysis using  $\alpha$ *Pf* uS11 antibody on RAPPL eluates of *P. falciparum* NF54 cells. Starting cells were diluted to  $5 \times 10^7$ ,  $1 \times 10^7$ ,  $5 \times 10^6$ , and  $1 \times 10^6$  cells before RAPPL procedure was executed. 20% of total bound fraction was used for analysis. Molecular weight markers indicate size of tagged *Pf* uS11 protein.

## Supplementary Figure 8

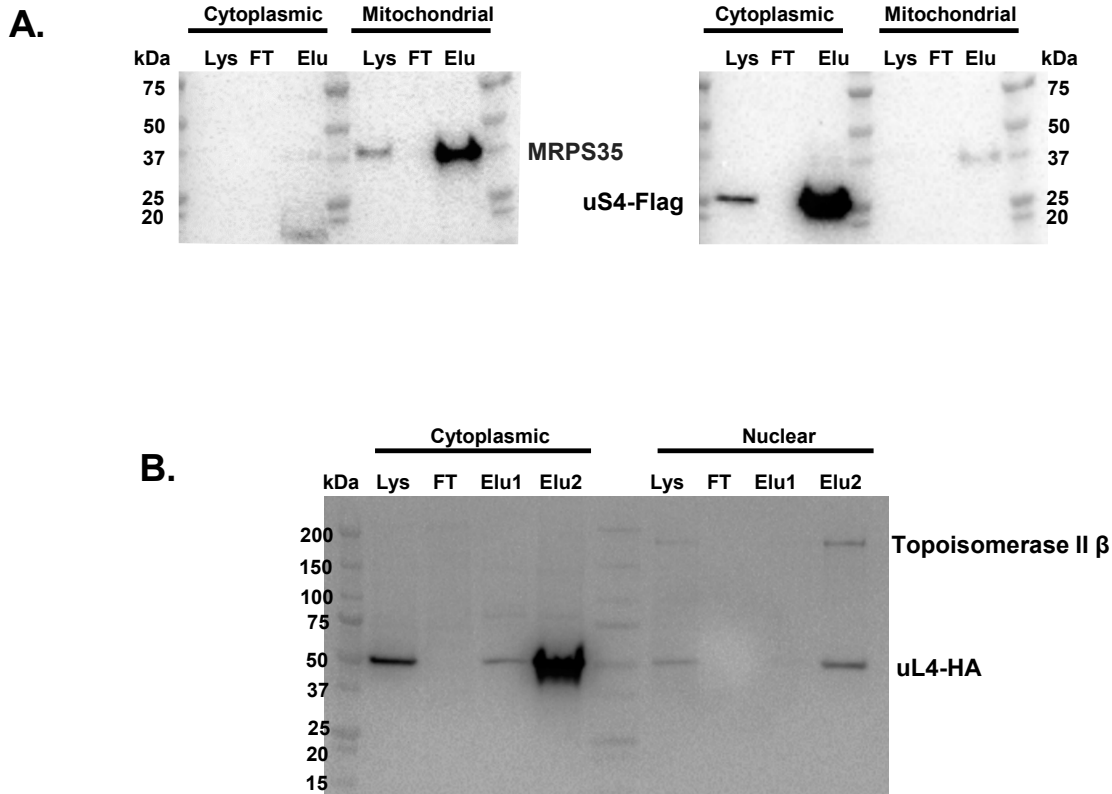

**Supplementary Figure 8. RAPPL can purify and enrich ribosomes from lysates of different organelles.** **A.** Western blot analysis using  $\alpha$ MRPS35 and  $\alpha$ Flag antibody on RAPPL eluates from mitochondrial and cytoplasmic fractions isolated from HEK-293 cells in which uS4 was Flag-tagged by CRISPR/Cas9. **B.** Western blot analysis using  $\alpha$ Topoisomerase II  $\beta$  and  $\alpha$ HA antibody on RAPPL eluates from cytoplasmic and nuclear fractions isolated from HEK-293 cells in which uL4 was HA-tagged by CRISPR/Cas9. Lysate (Lys), flow-through (FT), and RAPPL elution (Elu) are indicated in the figures. Molecular weight markers indicate size of tagged uS-4. MRPS25, uL4 and Topoisomerase II  $\beta$  protein.



## Supplementary Figure 9

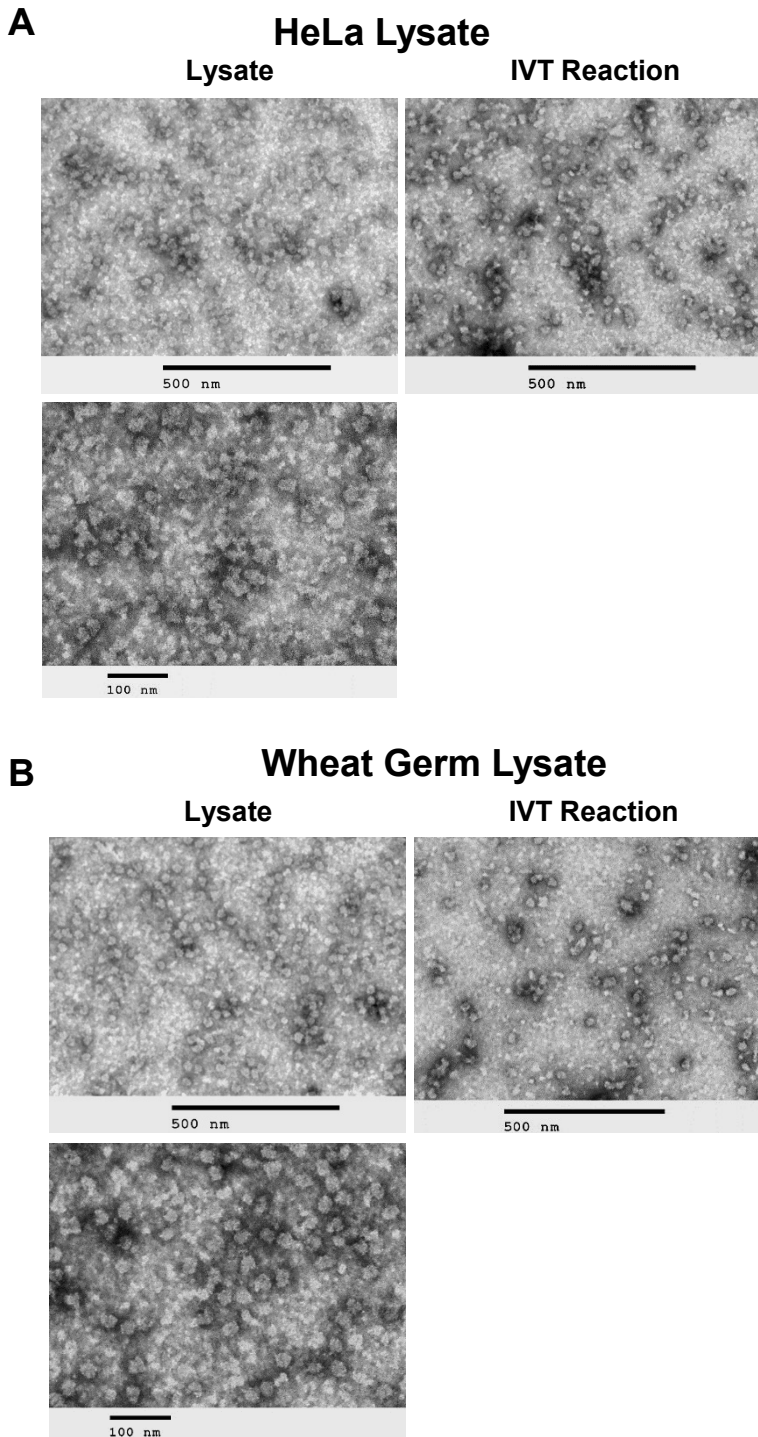

**Supplementary Figure 9. RAPPL can isolate non-translating and translating ribosomes from commercial cell lysates. A.** Thermo Scientific 1-Step IVT HeLa lysates in absence and presence of *in vitro* synthesized mCherry mRNA (IVT reaction). **B.** Promega TnT® Coupled Wheat Germ Lysate in absence and presence of *in vitro* synthesized mCherry mRNA (IVT reaction). All samples were subject to RAPPL and the eluates visualized by TEM. The scale bar represents 100 or 500 nm.

## Supplementary Figure 10

**A**

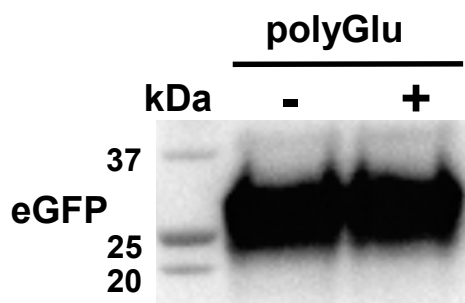

**B**

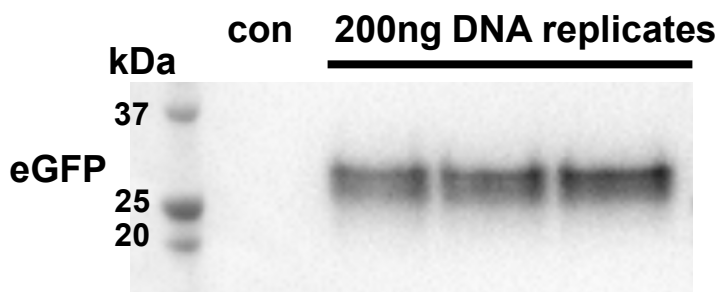

**C**

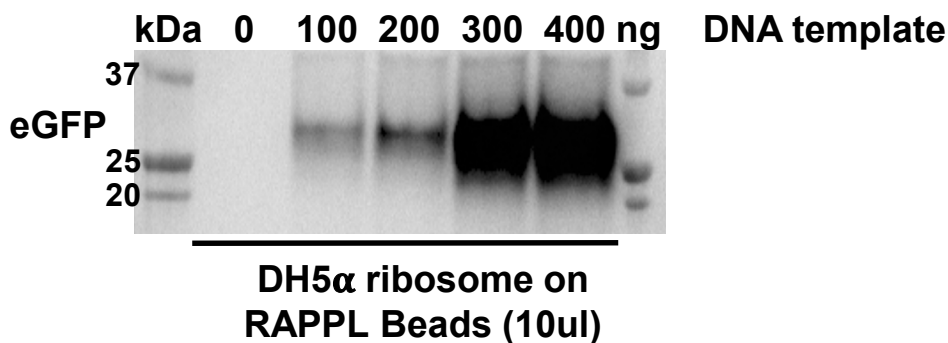

**Supplementary Figure 10. RAPPL purified *E. coli* ribosomes are translationally active.** **A.** Western blot analysis of NEB PURExpress *in vitro* reaction using eGFP DNA template. Reactions were executed in the absence (-) and presence (+) of poly-D-glutamate used in RAPPL elution buffer. **B.** Western blot analysis of eGFP protein synthesized in *in vitro* reactions using RAPPL isolated *E. coli Dh5α* ribosomes (1.5 μg / μL). Western blot samples correspond to fluorescence reading shown in Figure 5B. **C.** PURExpress reactions in the presence of increasing amounts of eGFP DNA template and 10 μL of poly-lysine (RAPPL) beads used to purify *E. coli Dh5α* ribosomes. eGFP antibody was used to visualize synthesis of eGFP protein. Molecular weight markers indicate size of eGFP protein.

# Supplementary Figure 11

| STATE                           | Partially Rotated             |
|---------------------------------|-------------------------------|
| Data collection statistics      |                               |
| Microscope                      | Titan Krios G3 300kV Cryo-TEM |
| Camera                          | Gatan K2 Summit on GIF filter |
| Voltage (kV)                    | 300                           |
| Magnification                   | 59kx                          |
| Total dose (e-/Å <sup>2</sup> ) | 55                            |
| Defocus range (μm)              | -0.6 to -2.0μm                |
| Exposure Time (s)               | 11.63                         |
| Dose Rate (e/px/s)              | 5.95                          |
| Fractions                       | 50                            |
| Calibrated pixel size (Å)       | 1.122                         |
| Micrographs collected           | 2,498                         |
| Initial number of particles     | 646683                        |
| Refined particles               | 294300                        |
| Symmetry                        | C1                            |
| Map resolution (Å)              | 2.7                           |

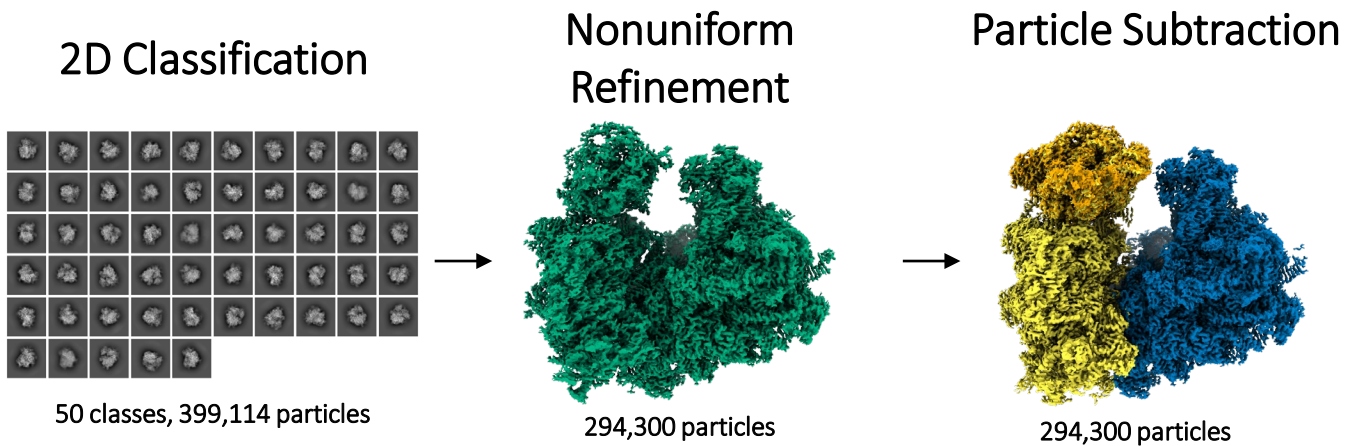

**Supplementary Figure 11. CryoEM processing of RAPPL purified and structurally characterized *C. neoformans* ribosomes.** Table representing cryoEM dataset collection parameters. Images indicate 2D classification, nonuniform refinement, and particle subtraction particle numbers.
